# Supplementary material for: Arbuscular Mycorrhizal Fungi Alleviate Salt Stress Damage by Coordinating Nitrogen Utilization in Leaves of Different Species
Source: MDPI journal article supplement (doi:10.3390/f13101568), 2022-09-26
Supplement: s1 [file s1]

## Supplementary

### 1.1. Plant dry weight

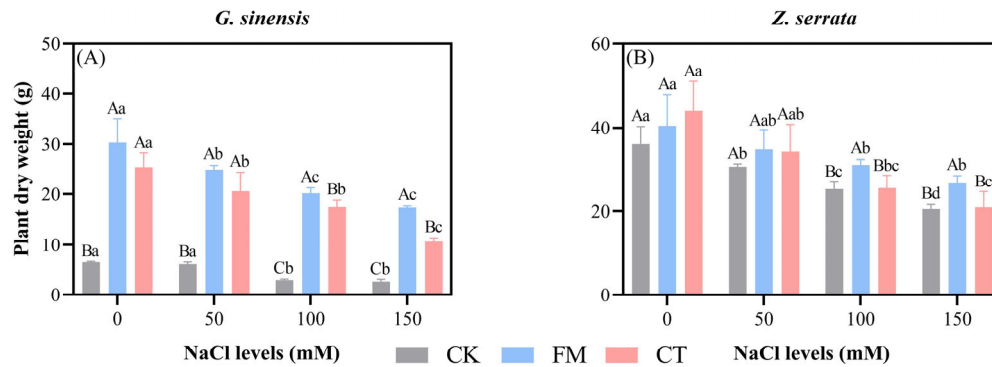

**Figure S1.** Variations in the plant dry weights between treatments. (A) plant dry weight of *G. sinensis* different treatments; (B) plant dry weight of *Z. serrata* different treatments. Uppercase letters indicate significant differences between various inoculation treatments under the same salt levels ( $P < 0.05$ ). Lowercase letters indicate significant differences between various salt concentrations under the inoculation treatments ( $P < 0.05$ ).

### 1.2. Correlation between NaCl levels, mycorrhizal colonization status and leaf physiology, plant dry weight

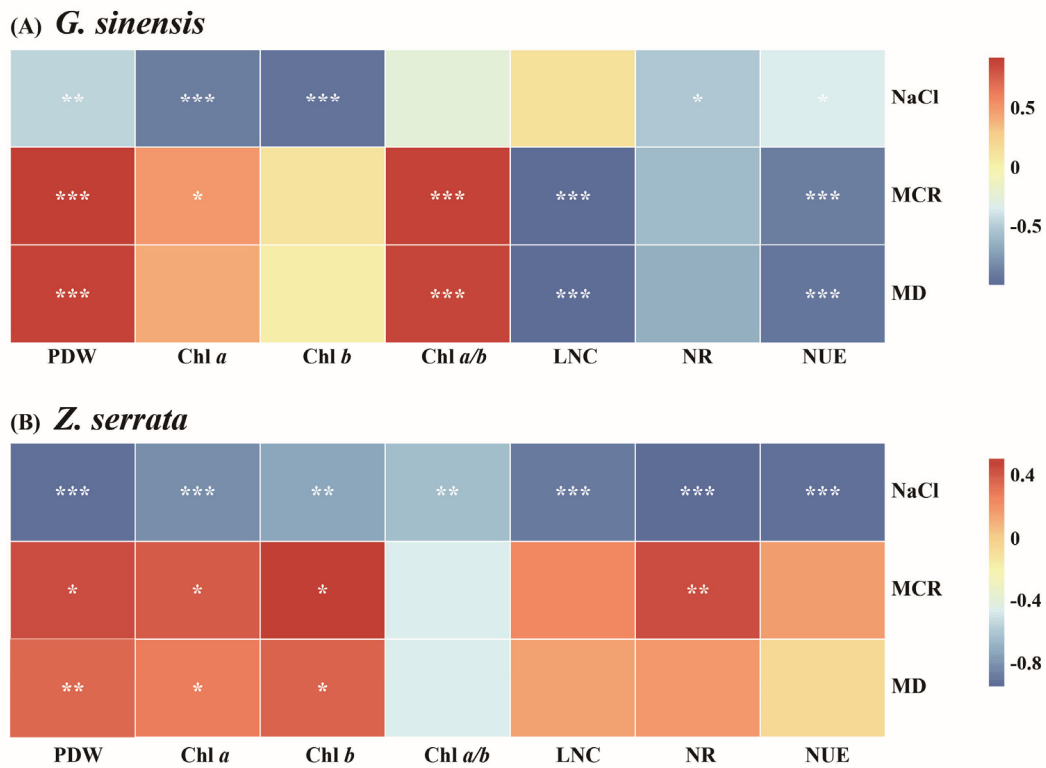

**Figure S2.** Correlation analysis of NaCl level, mycorrhizal colonization rate, mycorrhizal dependency and leaf physiology, plant dry weight. (A) Correlation analysis of various indicators of *G. sinensis*; (B) Correlation analysis of various indicators of *Z. serrata*. Abbreviations: NaCl, NaCl level; MCR,

mycorrhizal colonization rate; MD, mycorrhizal dependency; PDW, plant dry weight; Chl *a*, chlorophyll *a* content; Chl *b*, chlorophyll *b* content; Chl *a/b*, ratio of chlorophyll *a* content to chlorophyll *b* content; LNC, leaf nitrogen content; NR, nitrate reductase activity; NUE, photosynthetic N-use efficiency. \*\*\*indicates significant correlation at  $p < 0.001$ ; \*\* indicates significant correlation at  $p < 0.01$ ; \* indicates significant correlation at  $p < 0.05$ . The darker the color, the stronger the correlation; the lighter the color, the weaker the correlation.
